# Supplementary material
Source: publisher site journal article supplement (https://www.spandidos-publications.com/3016/downloadSupplementary)

Figure S1. Overexpression of SORBS2 inhibits the apoptosis of gastric cancer cells. (A) Immunoblotting analysis of SORBS2 in Ctrl- and SORBS2-transfected AGS and HGC-27 cells. Apoptosis was detected in Ctrl- and SORBS2-transfected (B) AGS and (C) HGC-27 cells. Left, images of apoptosis. Right, quantification results. \*\* $P < 0.01$ , \*\*\* $P < 0.001$  vs. Ctrl group. SORBS2, sorbin and SH3 domain containing 2.

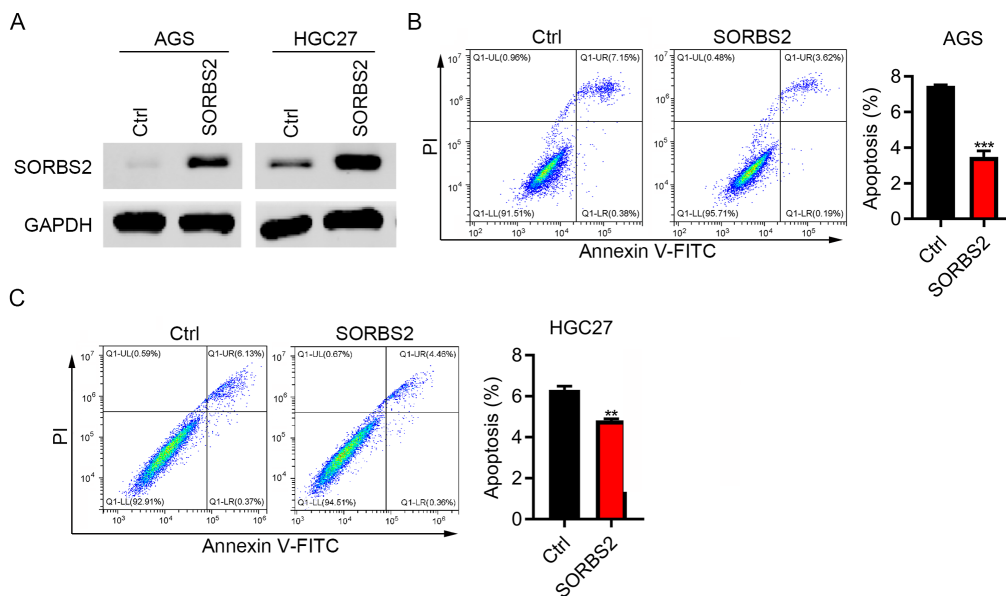

Supplement: Supplementary file 1 [file downloadSupplementary]
